# Supplementary material for: Novel Calcium-Binding Ablating Mutations Induce Constitutive RET Activity and Drive Tumorigenesis
Source: PubMed Central journal article supplement — Cancer Res. 2022 Sep 27;82(20):3751–62. doi: 10.1158/0008-5472.CAN-22-0834 (PMC9574375; doi:10.1158/0008-5472.can-22-0834), 2022-09-27
Supplement: can-22-0834_supplementary_figure_s4_suppsf4.pdf [file can-22-0834_supplementary_figure_s4_suppsf4.pdf]

## Supplementary Figure S4

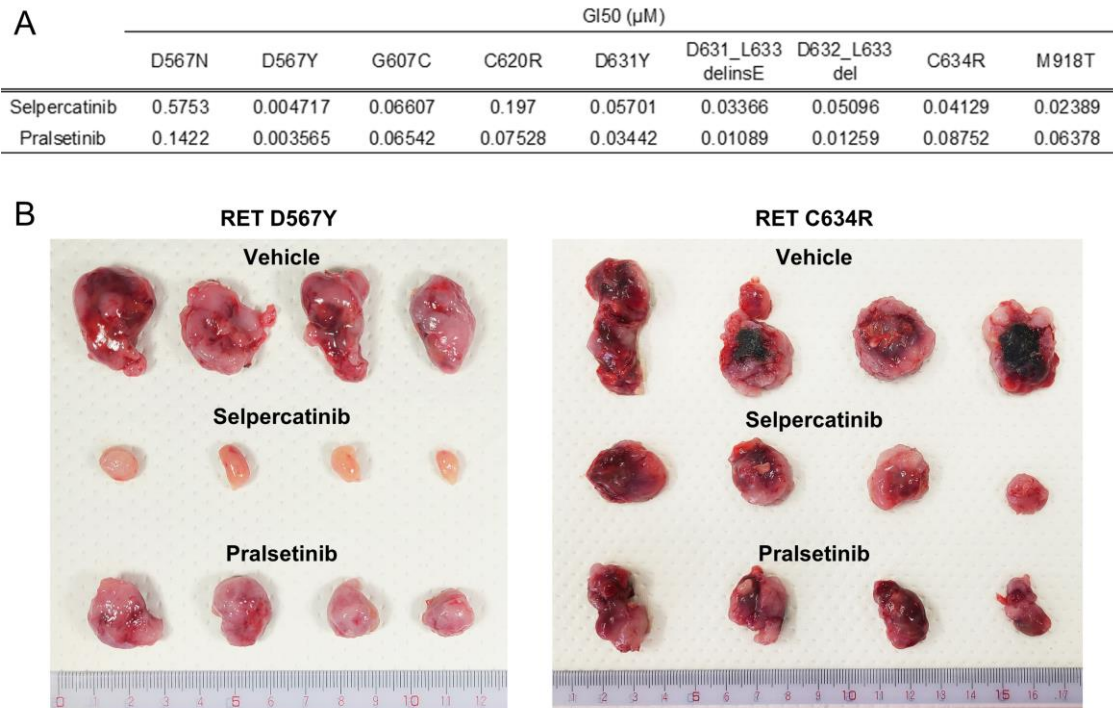

### Supplementary Figure S4. The oncogenic/tumorigenic activity of RET-CaLM mutants was suppressed by RET-TKIs

**A**, GI50 values of selpercatinib and pralsetinib for Ba/F3 cells expressing RET mutants. Data are expressed as the mean value of six replicates. GI50, 50% growth inhibitory concentration.

**B**, Tumors of RET mutant-expressing NIH3T3 cells after treatment with vehicle (top), selpercatinib (middle), or pralsetinib (bottom). Tumors for D567Y (left) and C634R (right) mutants were dissected from subjects after treatment completion.
