# Supplementary material for: Novel Calcium-Binding Ablating Mutations Induce Constitutive RET Activity and Drive Tumorigenesis
Source: PubMed Central journal article supplement — Cancer Res. 2022 Sep 27;82(20):3751–62. doi: 10.1158/0008-5472.CAN-22-0834 (PMC9574375; doi:10.1158/0008-5472.can-22-0834), 2022-09-27
Supplement: can-22-0834_supplementary_figure_s5_suppsf5.pdf [file can-22-0834_supplementary_figure_s5_suppsf5.pdf]

## Supplementary Figure S5

**A**

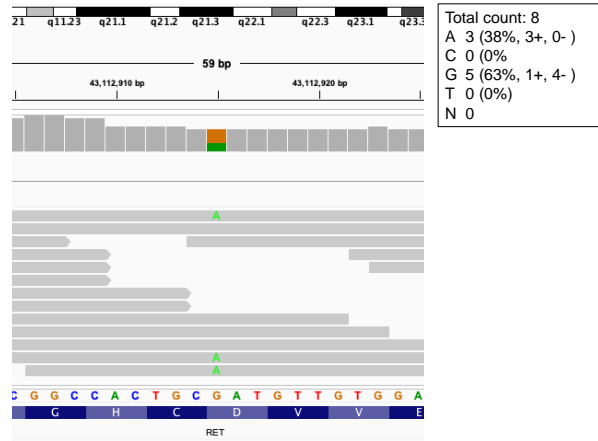

**B**

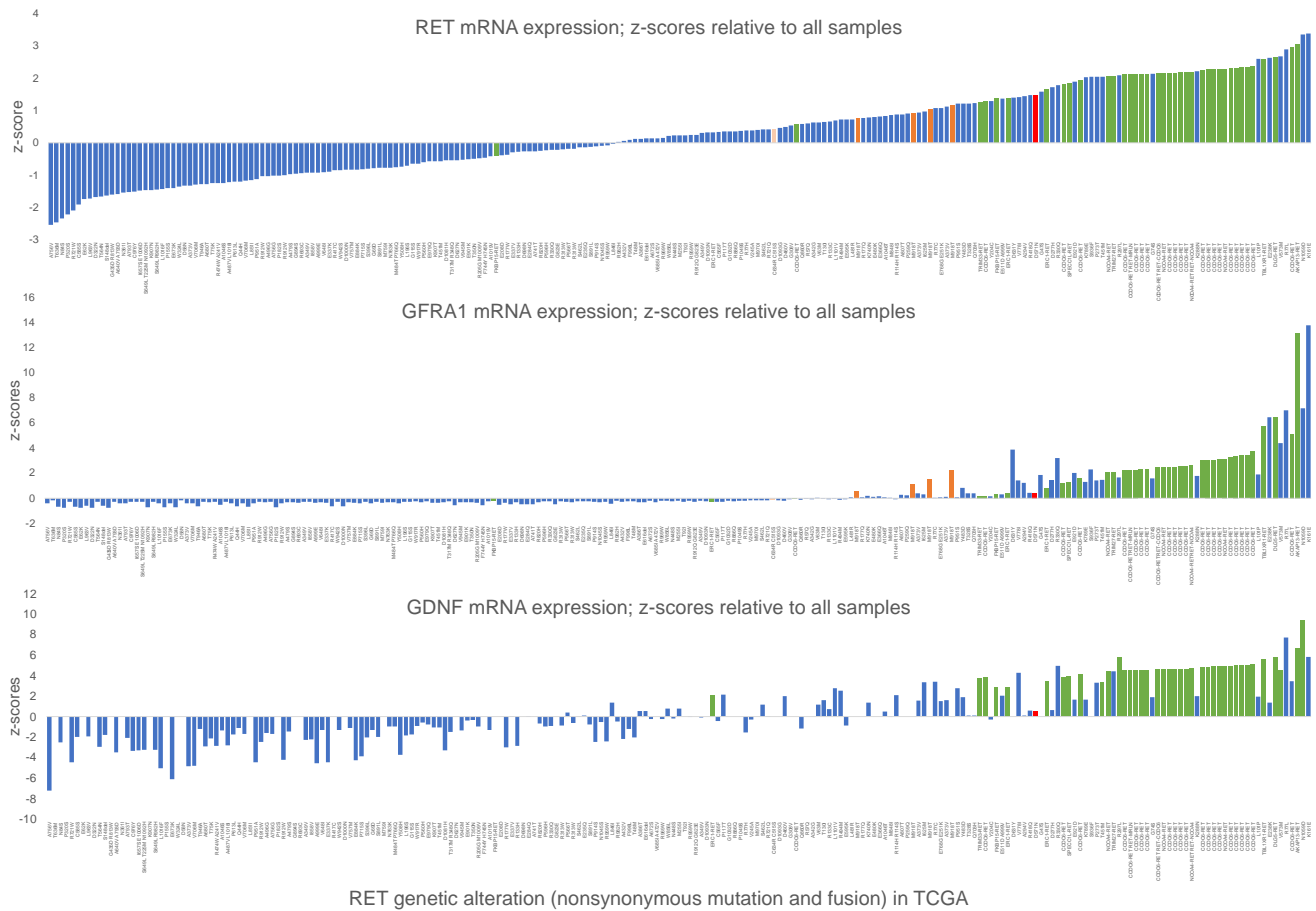

### Supplementary Figure S5. mRNA expression in the RET D571N mutated sample from TCGA

**A**, Genome images from the Integrative Genomics Viewer (Broad Institute) for the whole RNA sequencing data of the D571N-mutant colon adenocarcinoma sample (Sample ID: TCGA-AZ-4315, obtained from the NCI Genomic Data Commons). IGV showed mutation reads of guanine to adenine at 43112915 (aspartate 567 to asparagine).

**B**, mRNA expression data of RET (*upper*), GFRA1 (*middle*), and GDNF (*bottom*) as z-scores in TCGA. The list of calculated z-scores of the samples with nonsynonymous RET mutations and RET gene fusions was downloaded from cBioPortal (<https://www.cbioportal.org/>). The bar graphs show the mRNA expression z-scores relative to all samples on the horizontal axis for the aligned genetic abnormalities. The bar graph indicates the D571N mutant in red, fusions in green, the M918T mutants in orange, C634R mutants in light orange, and other mutants in blue.
